# Supplementary material for: Analysis of Antimicrobial Use and the Presence of Antimicrobial-Resistant Bacteria on Austrian Dairy Farms—A Pilot Study
Source: Antibiotics (Basel). 2022 Jan 18;11(2):124. doi: 10.3390/antibiotics11020124 (PMC8868072; doi:10.3390/antibiotics11020124)
Supplement: Supplementary file 1 [file antibiotics-11-00124-s001.zip › antibiotics-1545451-Supplementary-update.pdf]

# Analysis of antimicrobial use and the presence of antimicrobial-resistant bacteria on Austrian dairy farms – a pilot study

## Supplementary Material S1

Three online surveys were completed by farmers, herd veterinarians, and national milk recorders. The complete surveys in German are available from the authors upon request. Here, a summary of survey aspects relevant to udder health is provided in English.

*(This translation has previously been published in the Supplementary Materials of “Firth, C.L. et al. Relationship between the probability of veterinary-diagnosed bovine mastitis occurring and farm management risk factors on small dairy farms in Austria. J. Dairy Sci. 2019, 102, 4452–4463, doi:10.3168/JDS.2018-15657.)*

| Question                                                             | Source                 | Possible questionnaire responses              |
|----------------------------------------------------------------------|------------------------|-----------------------------------------------|
| Age of dairy cow                                                     | Herd data              |                                               |
| Altitude of farm                                                     | Herd data              |                                               |
| Lactation number                                                     | Herd data              |                                               |
| Herd size                                                            | Herd data              |                                               |
| Main production areas                                                | Herd data              | Various alpine and lowland regions            |
| Are farms managed full-time or part-time?                            | Farmers' questionnaire | Full-time<br>Part-time                        |
| How often is a bacteriological culture of mastitic milk carried out? | Farmers' questionnaire | Not regularly<br>Regularly                    |
| California mastitis test (CMT) is carried out?                       | Farmers' questionnaire | Never<br>Symptomatic animals<br>All animals   |
| Type of production system?                                           | Farmers' questionnaire | Conventional<br>Organic                       |
| Is a bacteriological culture of milk carried out before drying off?  | Farmers' questionnaire | Never<br>Symptomatic animals<br>Regularly     |
| How are cows routinely dried off?                                    | Farmers' questionnaire | Abruptly<br>Gradually                         |
| Are cows routinely dried off with antibiotics?                       | Farmers' questionnaire | Yes, all animals<br>Symptomatic animals or no |
| Are teat sealants used at drying off?                                | Farmers' questionnaire | Never<br>Occasionally<br>Regularly            |
| Are dry cows' udders regularly checked (includes visual check)?      | Farmers' questionnaire | Never/rarely<br>Occasionally                  |

|                                                                                  |                                         |                                                                            |
|----------------------------------------------------------------------------------|-----------------------------------------|----------------------------------------------------------------------------|
|                                                                                  |                                         | Regularly                                                                  |
| Separate calving box available?                                                  | Farmers' questionnaire                  | Yes<br>No                                                                  |
| Housing system                                                                   | Farmers' questionnaire                  | Tie-stall<br>Freestall                                                     |
| Is waste milk fed to calves?                                                     | Farmers' questionnaire                  | Yes – all calves<br>Yes – only bull calves<br>No                           |
| Who milks the cows regularly?                                                    | Farmers' questionnaire                  | 1 Person<br>More than one person<br>AMS                                    |
| How often are the cubicles/lying areas cleaned?                                  | Farmers' questionnaire                  | Twice a day<br>Once a day<br>Less frequently                               |
| How often is the bedding material replaced/freshened?                            | Farmers' questionnaire                  | Daily<br>Less often                                                        |
| Disinfection of cows' beds?                                                      | Farmers' questionnaire                  | Yes<br>No                                                                  |
| Age of the farm buildings?                                                       | Farmers' questionnaire                  | <= 10 years<br>> 10 years                                                  |
| Is there a convalescence box available?                                          | Farmers' questionnaire                  | Yes<br>No                                                                  |
| Insect prevention on farm?                                                       | Farmers' questionnaire                  | Irregularly<br>Regularly                                                   |
| How often are the cows fed?                                                      | Farmers' questionnaire                  | Once a day<br>Twice a day<br>Three times a day<br>Permanent access to feed |
| Are cows fed immediately after milking?                                          | Farmers' questionnaire                  | Yes<br>No                                                                  |
| Is there enough space along the feed passage for all cows to eat simultaneously? | Farmers' questionnaire                  | Yes<br>No                                                                  |
| Do cows have regular access to pasture?                                          | Farmers' questionnaire                  | Yes<br>No                                                                  |
| Do cows have access to an outdoor loafing area?                                  | Farmers' questionnaire                  | Yes<br>No                                                                  |
| Are homeopathic remedies used to treat udder disease?                            | Farmers' questionnaire                  | Yes<br>No                                                                  |
| Energy-corrected milk (kg) (varies according to cow breed)                       | National milk performance recorder data |                                                                            |
| Duration of milking (days)                                                       | National milk performance recorder data |                                                                            |
| Is a disinfectant (e.g., iodine) used to clean the teats?                        | NMR questionnaire                       | Yes<br>No                                                                  |
| Is there a milking order? (Are cows with udder disease milked last?)             | NMR questionnaire                       | Yes<br>No<br>Separate cluster                                              |
| Does the milking machine have an automatic shut off?                             | NMR questionnaire                       | Yes<br>No                                                                  |

|                                                                                                          |                        |                                                                                      |
|----------------------------------------------------------------------------------------------------------|------------------------|--------------------------------------------------------------------------------------|
| Are milkers carrying out other jobs (e.g. feeding calves) while milking?                                 | NMR questionnaire      | Yes<br>No<br>AMS                                                                     |
| Do the milkers wash/clean their hands before milking?                                                    | NMR questionnaire      | Yes<br>No<br>AMS                                                                     |
| Are gloves worn when milking?                                                                            | NMR questionnaire      | Yes<br>No<br>AMS                                                                     |
| Teat dipping is carried out with...                                                                      | NMR questionnaire      | Non-return dip cup<br>Standard dip cup<br>Spray<br>Not done<br>AMS                   |
| Are the clusters disinfected between cows?                                                               | NMR questionnaire      | Yes, between all cows<br>Yes, only between symptomatic cows<br>No                    |
| Type of milking system?                                                                                  | NMR questionnaire      | Milking parlor (+ any other type)<br>Vacuum line (+ any other type)<br>Bucket<br>AMS |
| How frequently are the liners in the clusters changed?                                                   | NMR questionnaire      | 2-4 times a year<br>Once a year<br>Less frequently than once a year                  |
| Cleanliness of the milking equipment/parlor?                                                             | NMR questionnaire      | Clean<br>Moderately to severely dirty                                                |
| Is straw contained in the bedding material used for lactating cows?                                      | NMR questionnaire      | Yes<br>No                                                                            |
| Is sawdust contained in the bedding material used for lactating cows?                                    | NMR questionnaire      | Yes<br>No                                                                            |
| Is forestripping done?                                                                                   | NMR questionnaire      | Yes<br>No                                                                            |
| Udder and teat cleaning is carried out...                                                                | NMR questionnaire      | Wet (e.g. with water)<br>Damp (e.g. with foam)<br>Dry (e.g. with paper)              |
| Udder and teat cleaning is carried out using single use methods (e.g. paper, disposable cloths)?         | NMR questionnaire      | Yes<br>No                                                                            |
| Hygiene score for udders prior to milking (estimated for the entire herd, based on a photographic scale) | Herd vet questionnaire | Clean-slightly soiled<br>Moderately – severely soiled                                |
| General farm hygiene – alleys                                                                            | Herd vet questionnaire | Clean<br>Moderately soiled<br>Severely soiled                                        |
| General condition of farm buildings where dairy cows are housed                                          | Herd vet questionnaire | Good condition<br>Moderate<br>Poor condition                                         |
| General assessment of overall farm hygiene                                                               | Herd vet questionnaire | Good<br>Not good (includes moderate and poor)                                        |

|                 |                             |                                                                                |
|-----------------|-----------------------------|--------------------------------------------------------------------------------|
| Dairy cow breed | Cattle breeders association | Austrian Fleckvieh (Simmental)<br>Braunvieh (Brown Swiss)<br>Holstein-Friesian |
|-----------------|-----------------------------|--------------------------------------------------------------------------------|

## Supplementary Materials S2

### PCR Methods

Primers used for amplification of *mecA* were *mecA* F 5'TGGCTCAGGTACTGCTATCCAC and *mecA* R 5'AGTTCTGCAGTACCGGATTTG C.

DNA amplification was carried out for *mecA* as follows: 95°C for 1 min followed by 30 cycles with 95°C for 30 sec, 55°C for 30 sec, 72°C for 30 sec; and finally 72°C for 4 min.

Primers used for amplification of *mecC* were *mecC* F 5'GCTCCTAATGCTAATGCA and *mecC* R 5'TAAGCAATAATGACTACC.

DNA amplification was carried out for *mecC* as follows: 95°C for 10 min followed by 30 cycles with 95°C for 20 sec, 52°C for 20 sec, 72°C for 2 min; and finally 72°C for 10 min.

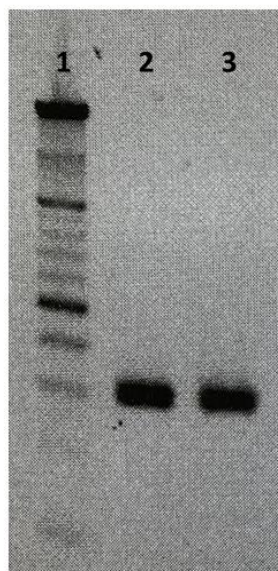

Fig. Agarose gel electrophoresis of amplified 304-bp *mecC* DNA fragment. Lanes: 1, 100-bp molecular weight marker (dark band was at 500 bp); 2, control strain *S. aureus* LGA251; 3, *S. aureus* strain 17/048.
